# Supplementary material
Source: MDPI journal article supplement (https://www.mdpi.com/2077-0472/12/1/117)
Supplement: s1 [file s1]

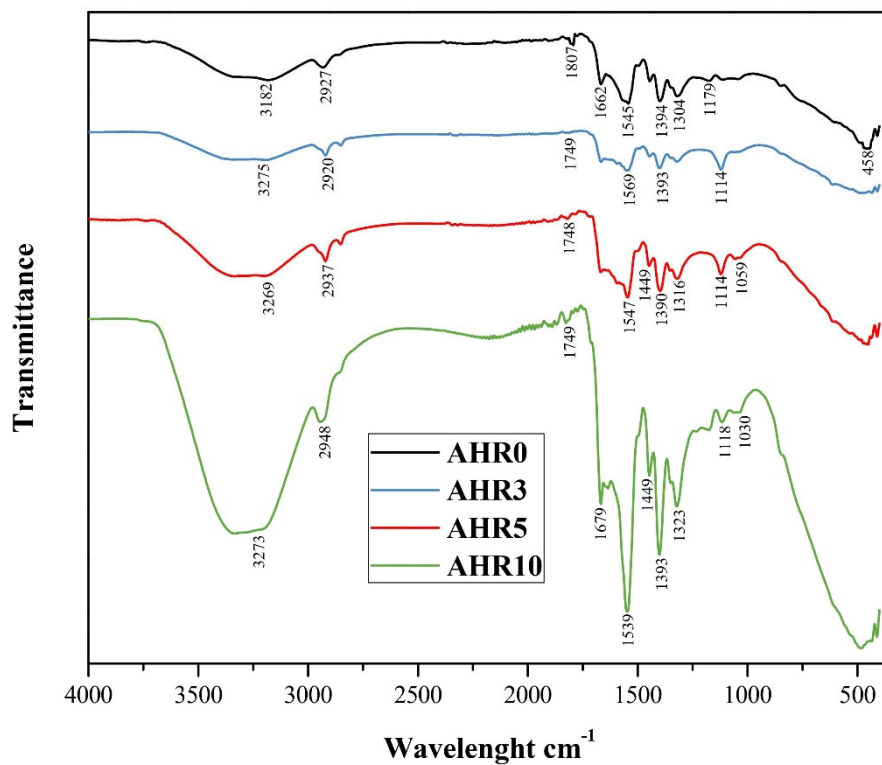

**Figure S1.** Infrared spectrum (FITR) of non-reinforced acrylic hydrogels (AHR0,,) and acrylic hydrogels reinforced with 3 % *w/w* (AHR3), 5 % *w/w* (AHR5), and 10 % *w/w* (AHR10) fique nanofiber.
